## REVIEW

# Metastasis suppressor, NDRG1, mediates its activity through signaling pathways and molecular motors

Jing Sun<sup>1,2,3</sup>, Daohai Zhang<sup>2</sup>, Dong-Hun Bae<sup>2</sup>,  
Sumit Sahni<sup>2</sup>, Patric Jansson<sup>2</sup>, Ying Zheng<sup>4</sup>, Qian Zhao<sup>4</sup>,  
Fei Yue<sup>1,3</sup>, Minhua Zheng<sup>1,3</sup>, Zaklina Kovacevic<sup>2,†</sup> and  
Des R.Richardson<sup>2,†,\*</sup>

<sup>1</sup>Department of General Surgery, Ruijin Hospital, Shanghai Jiao Tong University School of Medicine, Shanghai 200025, China, <sup>2</sup>Department of Pathology, Molecular Pharmacology and Pathology Program, University of Sydney, Sydney, New South Wales 2006, Australia, <sup>3</sup>Shanghai Minimally Invasive Surgery Center, Shanghai 200025, China and <sup>4</sup>Department of Pathophysiology, Key Laboratory of Cell Differentiation and Apoptosis of Chinese Ministry of Education, Shanghai Jiao Tong University School of Medicine, Shanghai 200025, China

\*To whom correspondence should be addressed. Tel: +61 2 9036 6548;  
Fax: +61 2 9351 3429;  
Email: d.richardson@med.usyd.edu.au

**The metastasis suppressor, N-myc downstream regulated gene 1 (NDRG1), is negatively correlated with tumor progression in multiple neoplasms, being a promising new target for cancer treatment. However, the precise molecular effects of NDRG1 remain unclear. Herein, we summarize recent advances in understanding the impact of NDRG1 on cancer metastasis with emphasis on its interactions with the key oncogenic nuclear factor-kappaB, phosphatidylinositol-3 kinase/phosphorylated AKT/mammalian target of rapamycin and Ras/Raf/mitogen-activated protein kinase kinase/extracellular signal-regulated kinase signaling pathways. Recent studies demonstrating the inhibitory effects of NDRG1 on the epithelial-mesenchymal transition, a key initial step in metastasis, TGF- $\beta$  pathway and the Wnt/ $\beta$ -catenin pathway are also described. Furthermore, NDRG1 was also demonstrated to regulate molecular motors in cancer cells, leading to inhibition of F-actin polymerization, stress fiber formation and subsequent reduction of cancer cell migration. Collectively, this review summarizes the underlying molecular mechanisms of the antimetastatic effects of NDRG1 in cancer cells.**

## The metastasis suppressor, N-myc downstream regulated gene 1

*N-myc downstream regulated gene 1 gene and regulation of its expression*

N-myc downstream regulated gene 1 (*NDRG1*) (also known as *Drg1*, *RTP*, *Rit42*, *PROXY-1* or *Cap43*) encodes a metastasis suppressor in a number of cancers including colon, prostate and breast cancers (1–3).

**Abbreviations:** Arp 2/3, actin-related protein 2/3; ATF3, activating transcription factor 3; EMT, epithelial–mesenchymal transition; ERK, extracellular signal-regulated kinase; GFR, growth factor receptor; GSK3, glycogen synthase kinase 3; GTP, guanosine triphosphate; HIF-1, hypoxia inducible factor 1; IKK, I $\kappa$ B kinase; LRP, lipoprotein receptor-related protein; MEK, mitogen-activated protein kinase kinase; mRNA, messenger RNA; mTOR, mammalian target of rapamycin; NDRG1, N-myc downstream regulated gene 1; NF- $\kappa$ B, nuclear factor-kappaB; pAKT, phosphorylated AKT; PIP2, phosphatidylinositol-2-disphosphate; PIP3, phosphatidylinositol-3-trisphosphate; PI3K, phosphatidylinositol-3 kinase; PTEN, phosphatase and tensin homolog; Rho, Ras homolog; T $\beta$ RI and II, type I and type II TGF- $\beta$  receptors; TCF, T-cell factor; TGF- $\beta$ , transforming growth factor- $\beta$ ; TSC, tuberous sclerosis complex; WASP, Wiskott–Aldrich syndrome family protein.

<sup>†</sup>These authors contributed equally as co-corresponding authors.

Homologs of this gene have been discovered in mice (*NDR1* and *TDD5*), *Caenorhabditis elegans* (*ZK1073.1*) and sunflowers (*SF21*), which suggest that *NDRG1* is highly conserved between species (1,4).

The *NDRG1* gene has been mapped to chromosome 8q24.3 (8q24.2 in other studies) (5), which is approximately 60 kb in length (1,5,6). This gene encodes a 3.0 kb messenger RNA (mRNA) that itself encodes a very stable, 43 kDa NDRG1 protein (composed of 394 amino acids), which is highly conserved among multicellular organisms (1,6–8). *NDRG1* contains a CpG island in its promoter and may therefore be regulated by methylation (9).

The *NDRG1* gene is one of the members of the human NDRG family, which comprises *NDRG2*, *NDRG3* and *NDRG4* that share a 53–64% homology with each other (7,10–12). The *NDRG1* mRNA is ubiquitously expressed in most human tissues, but its levels are high in the prostate, brain, kidney, placental and intestinal tissues (1,7). However, the NDRG1 protein is mainly found in epithelial cells, which may suggest that it has a specific function (1). Interestingly, NDRG1 is also highly expressed in primary granulocytes (13). It is well known that *NDRG2* is strongly expressed in the brain, heart, skeletal muscle and the spinal cord, whereas its expression in other organs was weak (7). The *NDRG3* gene is expressed in all organs but more so in the testis (7). The *NDRG4* gene is uniquely expressed in the brain and heart, with a number of isoforms being reported (i.e. *NDRG4*, *NDRG-4Bvar* and *NDRG-4H*) (14). The *NDRG4B* mRNA is detected in the brain only, whereas *NDRG4H* mRNA is more abundant in the heart than in the brain (14).

The expression of the *NDRG1* gene is regulated by nickel compounds, cobalt, hypoxia, oxidative stress, vitamins A and D, phorbol esters, steroids, histone deacetylase-targeting drugs, homocysteine,  $\beta$ -mercaptoethanol, tunicamycin, lysophosphatidylcholine, synthetic retinoids, oncogene (N-myc/c-myc), tumor suppressor gene (p53 and von Hippel-Lindau) and compounds that promote cell differentiation (10,15,16). *NDRG1* was once known as ‘reducing agents tunicamycin-responsive protein’ as it is upregulated by homocysteine, tunicamycin and  $\beta$ -mercaptoethanol and is involved in the proteasome-mediated endoplasmic reticulum-associated degradation of misfolded proteins (17,18). This was supported by reports of its proteasomal localization and interaction with endoplasmic reticulum chaperons and proteasomal subunits (18). Overexpression of N-myc or c-myc downregulates *NDRG1* expression (1,19). The tumor suppressor gene, von Hippel-Lindau has also been shown to downregulate *NDRG1* expression in renal cancer cells by targeting hypoxia inducible factor 1 (HIF-1) for degradation (1,20). On the other hand, hypoxia induces *NDRG1* expression through an early growth response 1 binding motif present in the *NDRG1* promoter (10). The *NDRG1* gene has three HIF-1 binding sites, where one is situated at its promoter and the remaining two in its 3′ untranslated region (21). This implies that NDRG1 can be regulated by HIF-1 through its binding sites in the untranslated region (22).

## Protein structure of NDRG1

The NDRG family of proteins is included within the  $\alpha/\beta$  hydrolase group of enzymes, despite the fact that the NDRG1 protein lacks a hydrolytic catalytic site and is deficient in enzyme function (7,17,23,24). This suggests that the gene has been modified by convergent evolution to obtain the same fold for a specific purpose (1). The amino acid sequence of NDRG1 encodes three tandem repeats of 10 hydrophilic amino acids (GTRSRSHTSE) in the C-terminal (COOH) region that is involved in the binding of heavy metal ions like nickel and copper (1,15,25,26). It lacks a transmembrane domain, signal sequence or endoplasmic reticulum sequence (1,5).

Additionally, NDRG1 is a multiphosphorylated protein that contains five calmodulin kinase 2 phosphorylation sites, three serine phosphorylation sites, a casein kinase II site, five myristoylation sites, three protein kinase C phosphorylation sites, one thioesterase site, one tyrosine phosphorylation site and one phosphopantotheine attachment site (27). Phosphorylation of NDRG1 is mediated through serum/glucocorticoid regulated kinase 1 and glycogen synthase kinase 3 (GSK3) (which are essential Ser/Thr kinase family proteins) (28). The role of phosphorylation is uncertain, but may be related to the numerous physiological functions of NDRG1 (29). Indeed, a recent study demonstrated that the phosphorylation of NDRG1 was spatially and temporally controlled during the cell cycle (30). In fact, phosphorylated NDRG1 was found to co-localize with centromeres and  $\beta$ -tubulin bundles during cytokinesis (30). This indicates a functional role for phosphorylated NDRG1 in centromere function (30).

The N-terminus of NDRG1 consists of two myc boxes (MBI and MBII), which are crucial for the protein's function, whereas the central region consists of MBIII (involved in cell transformation and apoptosis) and MBIV (for apoptosis induction, transformation and G<sub>2</sub> arrest) (7). The existence of multifunctional domains in the NDRG1 sequence may implicate its many functional roles in cell biology. Currently, there is no evidence that NDRG1 acts as a transcription factor itself, as the sequence of NDRG1 is not indicative of a transcription factor and it also lacks a nuclear targeting sequence (31). However, it may affect the function of other transcription factors such as nuclear factor- $\kappa$ B (NF- $\kappa$ B), mothers against decapentaplegic homolog 4 (Smad4), and so on and these will be further discussed in the below section.

### Distribution of NDRG1 in cells and tissues

Primarily, NDRG1 is a cytoplasmic protein expressed mostly in epithelial cells but its cellular localization depends upon the cell type (1,31). For intestinal and lactating breast epithelial cells, NDRG1 is associated with the plasma membrane; for prostate epithelial cells, NDRG1 is mainly localized to the nucleus; whereas for kidney proximal tubule cells, NDRG1 is associated with the mitochondrial inner membrane (1,31). This suggests that NDRG1 functions in a tissue-specific manner (1,31). However, other studies dispute this claim suggesting NDRG1 is not tissue-specific and claim that the protein is present in a wide variety of tissues (7,32). Analysis using the PSORTII software also predicts that NDRG1 is primarily a cytoplasmic protein (47.8%) followed by the nucleus (26.1%) and the mitochondrion (8.7%) (1). This suggests that NDRG1 has pleiotropic functions by possibly interacting with other proteins (33).

In certain cell types, the *NDRG1* gene is restricted to the nucleus despite lacking any nuclear localization signals in its protein structure (33). This indicates that interactions with nuclear protein(s) are necessary for the nuclear localization of this protein (34). One such nucleocytoplasmic transport protein, the heat-shock cognate protein (Hsc70) found in most cells, was shown to associate with *NDRG1* allowing the gene to enter the nucleus (35). Furthermore, when DNA is damaged by DNA-damaging agents such as actinomycin D, NDRG1 is transcriptionally upregulated and translocates from cytoplasm to the nucleus (36,37). This may suggest that NDRG1 has a role in DNA repair and is acting as a stress response gene (1). The possible role of NDRG1 was inferred from transcription factors such as p53, which also translocates to the nucleus in response to DNA damage (38).

The membrane-associated NDRG1 protein was mostly found adjacent to adherens junctions, intermediate and microfilament bundles, which insert into these structures (31). This suggests that NDRG1 may play an important role in cell adhesion and motility by directly influencing other molecules involved in these processes, such as E-cadherin (1,31). The role of NDRG1 in cell adhesion and motility will be further examined in section 'NDRG1 and its effect on molecular motors involved in cancer cell migration'.

### Expression in cancer

One of the most intensively studied functions of NDRG1 is its involvement in inhibiting cancer progression and metastasis (1). In particular,

*NDRG1* mRNA and protein levels were found to be decreased in tumor tissues when compared with normal tissues (1). In fact, over-expression of NDRG1 in cancer cells may not only induce cellular differentiation (12) but also reduce invasion (39). Several studies have also reported a positive correlation between NDRG1 expression and patient survival, indicating that NDRG1 may be a prognostic biomarker in cancer patients (5). Indeed, accumulating evidence shows that NDRG1 is negatively correlated with tumor progression and functions as a potent metastasis suppressor (39,40).

Paradoxically, some studies demonstrated that NDRG1 is highly expressed in hepatocellular carcinoma (10) and cervical cancer (34), with its levels being positively associated with vascular invasion, metastasis and poor prognosis. In these studies, silencing NDRG1 reduced proliferation, invasion and apoptosis *in vitro* while inhibiting tumor growth *in vivo* (10,34,41). Although genetic mutations of NDRG1 in these tissues could not be excluded, these latter findings may imply a cancer-type-dependent function of NDRG1.

### Mechanism of action of NDRG1

Mechanistic studies at the molecular level revealed that NDRG1 can regulate key signaling pathways involved in oncogenesis, including: (i) the NF- $\kappa$ B pathway (42); (ii) the phosphatidylinositol-3 kinase (PI3K)/protein kinase B (AKT)/mammalian target of rapamycin (mTOR) signaling network (39); (iii) Ras/Raf/mitogen-activated protein kinase kinase (MEK)/extracellular signal-regulated kinase (ERK) pathway (39); (iv) transforming growth factor- $\beta$  (TGF- $\beta$ ) network (39) and (v) the Wnt pathway (40). Consequently, NDRG1 could interrupt many metastasis-associated biological functions, including the epithelial-mesenchymal transition (EMT), migration and invasion (39,40). Therefore, NDRG1 may act as a central regulator of multiple signaling pathways that modulate tumor progression. This review will focus on the recently described regulatory functions of NDRG1 in cancer cell signaling, particularly its role in regulating cancer metastasis through affecting key molecular effectors.

### NDRG1 interacts with key signaling cascades

Recent studies have identified that NDRG1 interacts with the NF- $\kappa$ B (42,43) (Figure 1), PI3K/AKT/mTOR (39,44–47) (Figure 2) and the Ras/Raf/MEK/ERK pathways (39,47) (Figure 3). These interactions are outlined in the following sections.

#### NF- $\kappa$ B signaling pathway

The NF- $\kappa$ B signaling pathway plays a major role in metastasis, with NF- $\kappa$ B activation being tightly regulated *via* its localization (48) (Figure 1). In resting phase cells, the Rel-like domain-containing proteins, including RelA, NF- $\kappa$ B1/p105, NF- $\kappa$ B1/p50, RelB, NF- $\kappa$ B2/p100 and NF- $\kappa$ B2/p52, form homo- or hetero-dimeric NF- $\kappa$ B complexes in the cytoplasm (49). The NF- $\kappa$ B proteins are bound by inhibitors of NF- $\kappa$ B (I $\kappa$ B), including I $\kappa$ B $\alpha$ , I $\kappa$ B $\beta$  and I $\kappa$ B $\epsilon$ , which inhibit the entry of the NF- $\kappa$ B complex into the nucleus (48,49).

When the membrane receptors (e.g. tumor necrosis factor receptor/tumor necrosis factor receptor-associated factor 3, lymphotoxin  $\beta$  receptor) are triggered, NF- $\kappa$ B signaling becomes activated and exerts its downstream effects through the classical (canonical) pathway initiated by NF- $\kappa$ B1 (p50/p105) and an alternative (non-canonical) pathway initiated by NF- $\kappa$ B2 (p52/p100) (48) (Figure 1). The canonical pathway involves activation of the I $\kappa$ B kinase (IKK) complex including IKK $\alpha$ , IKK $\beta$  and IKK $\gamma$  (NEMO) (48) (Figure 1). Activation of the IKK complex leads to phosphorylation of I $\kappa$ B, which is then ubiquitinated and degraded through the 26S proteasome in the cytoplasm, leading to NF- $\kappa$ B1/p105 cleavage into NF- $\kappa$ B1/p50. NF- $\kappa$ B1/p50 binds to RelA and translocates into the nucleus (48) (Figure 1). On the other hand, the non-canonical pathway involves NF- $\kappa$ B-inducible kinase that mediates phosphorylation of NF- $\kappa$ B2/p100, leading to its cleavage into the p52 subunit. The cleaved p52 binds to RelB and translocates to the nucleus (48) (Figure 1). Once in the nucleus, RelA/p50 and RelB/p52 undergo a series of post-translational modifications including phosphorylation,

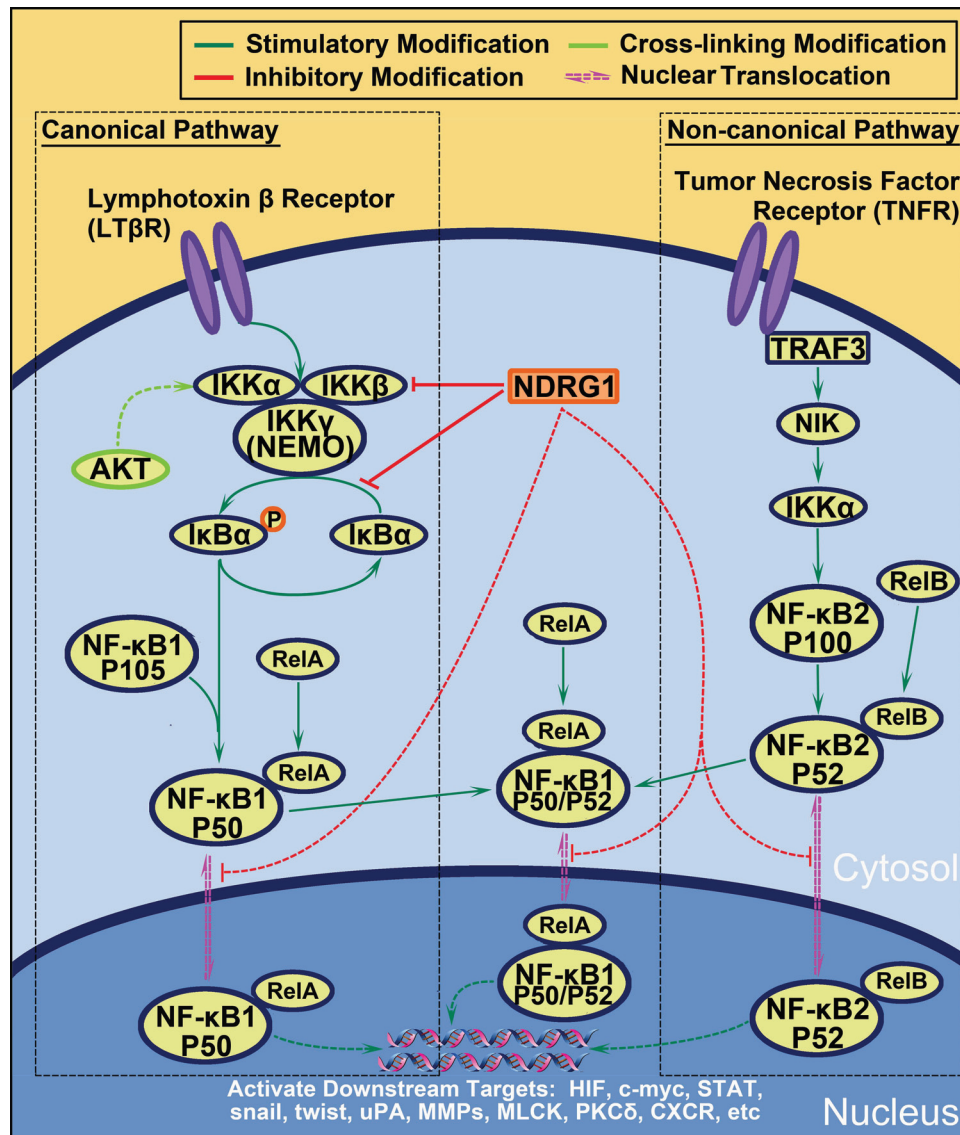

**Fig. 1.** NDRG1 is involved in NF- $\kappa$ B signaling for cancer metastasis. The NF- $\kappa$ B signaling pathway is involved in cancer metastasis. The canonical pathway involves activation of the IKK complex including IKK $\alpha$ , IKK $\beta$  and IKK $\gamma$  (NEMO). Inhibitor of NF- $\kappa$ B (I $\kappa$ B) is phosphorylated, ubiquitinated and degraded in the cytoplasm, releasing NF- $\kappa$ B1/p105, which gets cleaved into NF- $\kappa$ B1/p50. NF- $\kappa$ B1/p50 binds to RelA and translocates into the nucleus, where it initiates transcription of gene products involved in metastasis. The alternative (non-canonical) pathway involves NF- $\kappa$ B-inducible kinase-initiated IKK $\alpha$ -mediated phosphorylation of NF- $\kappa$ B2/p100, leading to proteasome processing and creation of the NF- $\kappa$ B2/p52 subunit. The RelB/NF- $\kappa$ B2/p52 heterodimer then translocates into the nucleus to bind the promoter of genes whose products are important in metastasis. NDRG1 can attenuate the nuclear translocation of RelA and NF- $\kappa$ B1/p50 and their binding to the NF- $\kappa$ B binding motif by markedly suppressing the expression of IKK $\beta$  and also by blocking I $\kappa$ B $\alpha$  phosphorylation. Full lines represent direct modifications. Dashed lines represent indirect modifications.

acetylation and methylation followed by binding to specific  $\kappa$ B sites to activate NF- $\kappa$ B target genes (48) (Figure 1). The NF- $\kappa$ B signaling pathway modulates the expression of a series of transcription factors, such as HIF-1 (50), c-Myc (51), signal transducers and activators of transcription (52), Snail (53) and Twist (54), all of which have significant roles in cancer metastasis (Figure 1).

NF- $\kappa$ B mediates cell adhesion through regulating urokinase-type plasminogen activator (55), matrix metalloproteinase/tissue inhibitor of metalloproteinase complexes (56), intercellular adhesion molecule-1/vascular adhesion molecule-1 (57), fibronectin (58) and caveolin 1 (59). Interestingly, NF- $\kappa$ B also activates stress fibers through myosin light chain (MLC) kinase, leading to increased cell migration (60). Other NF- $\kappa$ B targets include protein kinase C  $\delta$  (40), p21 (61), vimentin (62) and the CXCR chemokine receptor (63).

Recently, it was reported that NDRG1 can attenuate the nuclear translocation of RelA/p50 and its binding to the NF- $\kappa$ B motif by

blocking I $\kappa$ B $\alpha$  phosphorylation (43). This was found to occur as a result of suppressed IKK $\beta$  levels, which were downregulated by NDRG1 (Figure 1) via increasing the ubiquitination and proteasomal degradation of IKK $\beta$  (43). As a result, NDRG1 has further downstream effects on activating transcription factor 3 (ATF3), which also contains the NF- $\kappa$ B motif (42). The suppressed levels of ATF3 in prostate cancer cells were correlated with increased levels of the metastasis suppressor KAI-1, which was markedly upregulated in response to NDRG1 (42). Indeed, *KAI-1* is transcriptionally suppressed by ATF3 binding to its promoter (42). Hence, the ability of NDRG1 to mediate degradation of IKK $\beta$  has a 'ripple effect' on a number of downstream targets of the NF- $\kappa$ B pathway including I $\kappa$ B $\alpha$ , ATF3 and subsequently, KAI-1, which was found to be crucial for the antimetastatic effects of NDRG1 (42).

Interestingly, a recent study has reported that the phosphorylation of NDRG1 at Ser330 and Thr346 by serum/glucocorticoid regulated



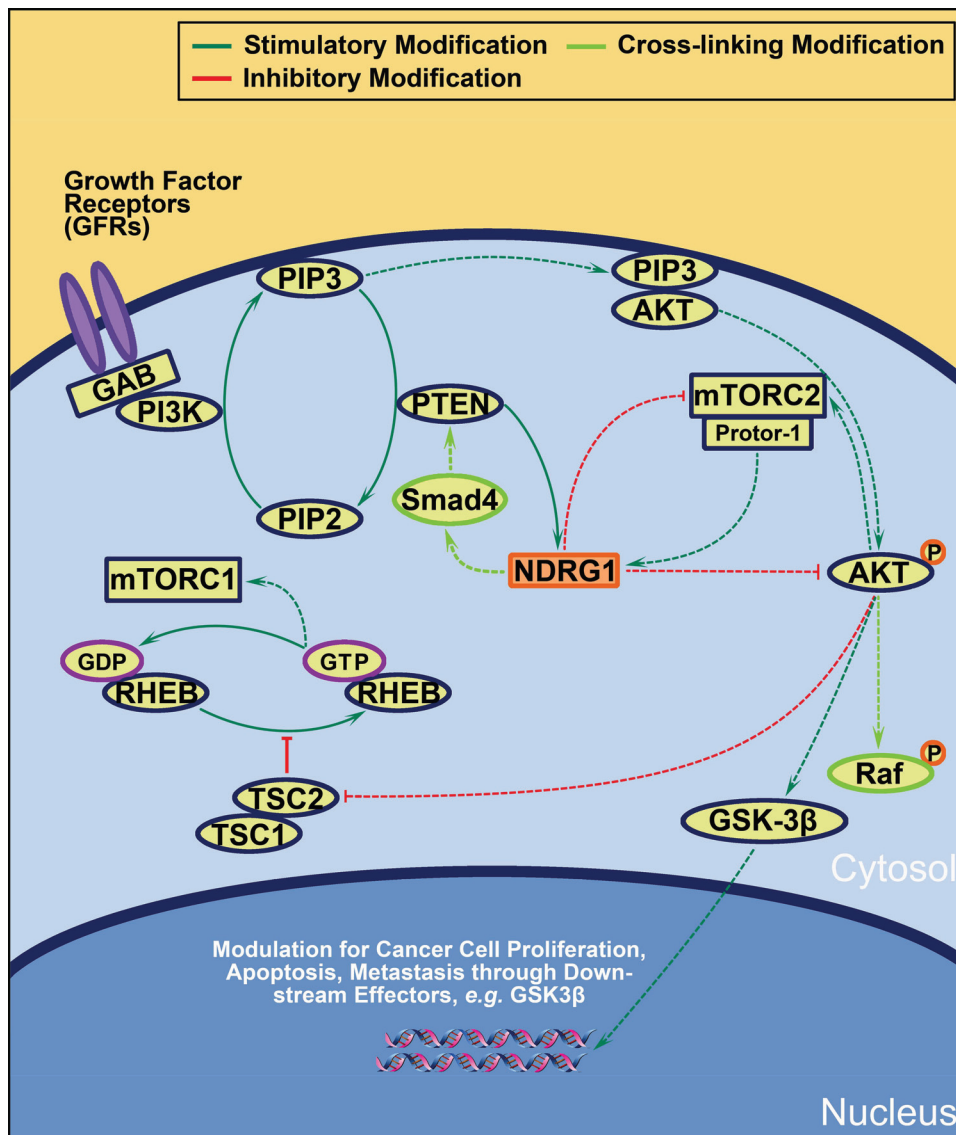

**Fig. 2.** NDRG1 is involved in PI3K/AKT/mTOR signaling for cancer metastasis. Activated PI3K phosphorylates PIP2 to generate membrane-bound PIP3, leading to AKT phosphorylation and activation. Phosphorylated AKT then activates downstream targets that promote metastasis. The lipid phosphatase PTEN dephosphorylates PIP3 to PIP2, leading to inhibition of AKT activity. A close link between NDRG1 and PTEN was demonstrated. Overexpression of PTEN significantly upregulates NDRG1, whereas NDRG1 can also increase PTEN protein expression in pancreatic cancer cells, suggesting a positive feedback loop between these two molecules. Moreover, NDRG1 also reduces expressions of pAKT and mTOR. Full lines represent direct modifications. Dashed lines represent indirect modifications.

kinase 1 was essential for it to inhibit the NF- $\kappa$ B pathway (64). This observation suggests that the functional roles of NDRG1 may be dictated by its phosphorylation, with certain phosphorylation states being able to activate this metastasis suppressor.

*PI3K/AKT/mTOR signaling*

The PI3K/AKT/mTOR signaling pathway regulates the activities of a broad range of downstream molecular effectors that modulate the metastatic behavior of cancer cells (65) (Figure 2). There are three classes of PI3K enzymes, among which class I is the most intensively investigated. Class I PI3K enzymes include p110 $\alpha$ ,  $\beta$ ,  $\gamma$  and  $\delta$  catalytic isoforms, which are controlled by coupling with their respective regulatory isoforms (p85 and p110) to affect their lipid kinase activity (66). Once activated by membrane receptors [e.g. growth factor receptors (GFRs)], the binding proteins (e.g. GFR-bound protein) cause PI3K enzymes to catalyze the phosphorylation of phosphoinositides, resulting in the generation of

phosphatidylinositol-3-trisphosphate (PIP3) from phosphatidylinositol-2-disphosphate (PIP2) (67) (Figure 2).

PIP3 acts as docking site for the recruitment of proteins with a pleckstrin homology domain such as phosphoinositide-dependent kinase 1 and AKT at the plasma membrane (Figure 2) (68). Activation of AKT by phosphorylation results in phosphorylation of its downstream targets, including mTOR (Figure 2). The mTORs are a family of Ser/Thr kinases involved in the PI3K pathway, which exist in two multiprotein complexes: namely, mTOR complex 1 and 2 (mTORC1 and mTORC2) (69). The phosphorylated AKT (pAKT) can also inhibit the tuberous sclerosis complex (TSC). Through its guanosine triphosphatase (GTPase)-inactivating protein activity toward Ras homolog (Rho) enriched in brain, the TSC1–TSC2 complex inhibits mTORC1 (70). Hence, pAKT promotes the activity of both mTORC1 and mTORC2.

Once activated, AKT regulates a wide array of downstream effectors that ultimately lead to cancer metastasis (Figure 2). For example, pAKT modulates GSK3-mediated cancer proliferation, inhibits apoptosis and promotes migration and invasion (65). This cascade

can be antagonized by the phosphatase and tensin homolog deleted on chromosome 10 (PTEN), a tumor suppressor that dephosphorylates PIP3 back to PIP2 and leads to decreased pAKT levels (65) (Figure 2).

Bandyopadhyay *et al.* (44) demonstrated a link between NDRG1 and PTEN. These investigators observed that overexpression of PTEN significantly upregulates the endogenous expression of NDRG1, whereas inhibition of PTEN by small interfering RNA decreases NDRG1 levels in a dose- and time-dependent manner. Interestingly, this latter study also revealed that the addition of a PI3K inhibitor, LY-294002, restored NDRG1 expression, indicating that PTEN controls NDRG1 by a PI3K/AKT-dependent pathway (44). On the other hand, NDRG1 can also increase PTEN protein expression in pancreatic cancer cells, suggesting a positive feedback loop between these two molecules (47) (Figure 2). The mechanism by which NDRG1 increases PTEN expression remains to be elucidated, although recent studies have demonstrated that NDRG1 does not increase *PTEN* mRNA levels (47). This observation suggests a post-transcriptional effect such as increased protein stability or reduced proteasomal degradation of PTEN.

Recently, we also demonstrated that NDRG1 reduces the expression of pAKT and its downstream target mTOR, and this is likely to occur as a result of the increased PTEN expression that inhibits pAKT (65). This

finding further establishes the mechanistic interaction between NDRG1 and the PI3K-centered signaling network (Figure 2) (71).

NDRG1 also increased the expression of the key tumor suppressor, Smad4, in pancreatic cancer cells, although the mechanisms behind this effect remain to be established (39). Increased Smad4 expression can abolish the TGF- $\beta$ -mediated suppression of PTEN, allowing this latter protein to inhibit PI3K/pAKT signaling (45). Interestingly, NDRG1 is also linked with a component of mTORC2, namely Protor-1, with mice bearing a Protor-1 knock-out having markedly reduced NDRG1 levels in kidney tissues (46). Hence, NDRG1 may have multiple interactions with the PI3K/AKT/mTOR pathway, which could contribute to its antimetastatic effects (Figure 2).

*Ras/Raf/MEK/ERK signaling*

The Ras/Raf/MEK/ERK signaling pathway also has key roles in the transmission of proliferative signals from membrane-bound receptors (72) (Figure 3). Ras becomes activated after growth factor stimulation of corresponding receptors (e.g. receptor tyrosine kinases and insulin-like growth factor 1 receptor), which stimulates the GFR-bound protein 2/guanine nucleotide exchange factor Son of Sevenless complex (73,74).

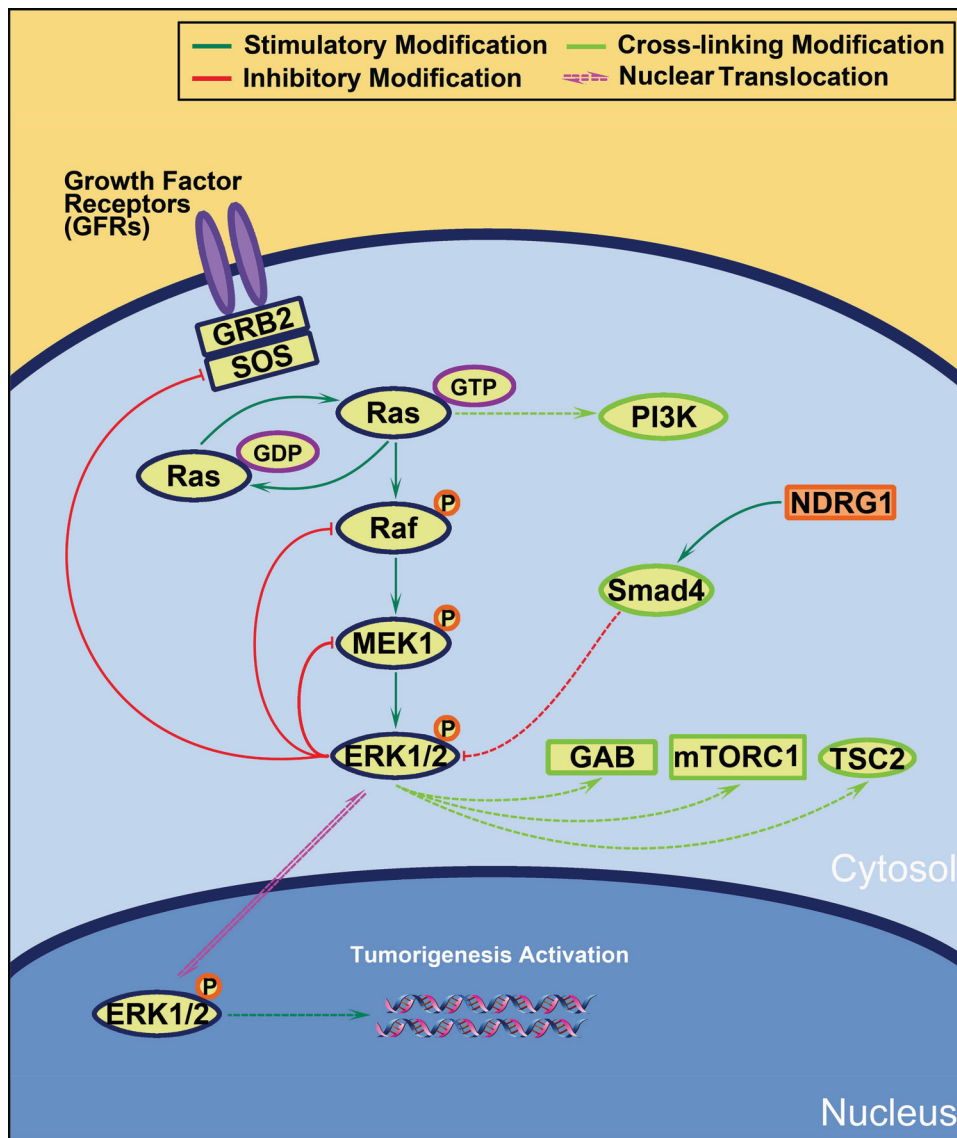

**Fig. 3.** NDRG1 is involved in Raf/MEK1/ERK signaling for cancer metastasis. Activation of GFRs triggers the binding of Ras with GTP. The active Ras:GTP then activates Raf/MEK1/ERK1/2 *via* phosphorylation, leading to activation of downstream targets. NDRG1 inhibits this pathway *via* the upregulation of Smad4. Full lines represent direct modifications. Dashed lines represent indirect modifications.

Once activated by GFR-bound protein 2/Son of Sevenless, Ras is triggered to bind with GTP, functioning as an guanosine diphosphate/GTP-regulated binary on-off switch that regulates cytoplasmic signal transduction (75) (Figure 3). The active Ras:GTP activates Raf *via* phosphorylation (76). Raf is then responsible for serine/threonine phosphorylation of MEK1, allowing this latter molecule to phosphorylate ERK1 and 2, leading to phosphorylation and activation of downstream cascades (Figure 3) (77).

In some cancer cells, Ras proteins contain single amino acid mutations (commonly at residuals 12, 13 or 61) that cause it to become persistently GTP bound and active, resulting in continuous activation of the downstream signaling cascade (78). In addition, loss of Smad4 expression enhances Ras signaling that can lead to progression to undifferentiated carcinoma (79). Interestingly, overexpression of NDRG1 increases Smad4 levels, which subsequently inhibits ERK phosphorylation (47). This indicates the involvement of NDRG1 in modulating the Ras/Raf/MEK/ERK pathway (Figure 3).

The three signaling pathways described above, including Ras/Raf/MEK/ERK, PI3K/AKT/mTOR and NF- $\kappa$ B pathways, interact to form a network that decides cell fate. The Ras/Raf/MEK/ERK and PI3K/AKT/mTOR pathways are able to cross-inhibit and cross-activate each other (80). In addition, while one pathway is blocked, the others can be effectively activated (80). This signaling co-ordination mainly involves GFR-bound protein phosphorylation by ERK (Figure 3) and Raf phosphorylation by AKT (Figure 2) (81,82). Components of the Ras/Raf/MEK/ERK pathway also positively regulate the PI3K/AKT/mTOR pathway through key integration points such as tuberous sclerosis protein 2 (TSC2) and mTOR1 (Figures 2 and 3) (83). NF- $\kappa$ B signaling is also targeted by the PI3K/AKT pathway (84). In fact, the activation of PI3K/AKT signaling could trigger the activation of NF- $\kappa$ B through the canonical pathway (84) (Figure 1). As NDRG1 is able to modulate each of these pathways, we hypothesize that NDRG1 could act as a regulatory molecule that bridges signaling networks.

### NDRG1 affects the EMT

The EMT is a highly conserved process controlled by a series of transcription factors that lead epithelial-originated cells to undergo a shift to a mesenchymal phenotype (85). Cells that undergo EMT are characterized typically by a phenotype change from a polygonal/columnar shape with apico-basolateral polarization into a spindle shape with anterior–posterior polarization, leading to enhanced migratory potential (85).

Notably, EMT is a well-organized process, with one of the earliest events involving the disruption of tight junctions that connect epithelial cells and de-localization of tight junction proteins, including zonula occludens 1, claudin 1 and occludin (86). Adherens junction complexes, which contain E-cadherin and  $\beta$ -catenin, are also disrupted, with the actin cytoskeleton being re-organized into actin stress fibers that are anchored to the focal adhesion complexes (87). Upon EMT, cells lose their apical-basal polarities and express mesenchymal markers, including N-cadherin, vimentin, fibronectin, smooth muscle  $\alpha$ -actin and fibroblast-specific protein-1 (88,89). The resultant mesenchymal cells exhibit reduced adhesive properties and increased expression and secretion of extracellular matrix metalloproteinases, leading to increased migratory and invasive capacity.

Modification of the EMT process is very complicated. In brief, there are two major signaling pathways that may regulate this process: the TGF- $\beta$  pathway and the Wnt/ $\beta$ -catenin pathway (Figures 4 and 5).

#### NDRG1 and TGF- $\beta$ pathway

The TGF- $\beta$  pathway is the most important signaling cascade regulating EMT in various cancer cell types (90). When treated with TGF- $\beta$ , many cancer cell lines show morphological alterations typical of EMT, including the loss of epithelial and gain of mesenchymal markers (39). The large latent TGF- $\beta$  complex is formed by latent TGF- $\beta$  binding proteins binding to the inactive, non-covalently associated small latent TGF- $\beta$  complex (91) (Figure 4). Upon acidic

microenvironments and activation by proteolytic enzymes, such as insulin-like growth factor, matrix metalloproteinase, thrombospondin-1 and integrin (91), large latent TGF- $\beta$  complex is cleaved to release a mature, bioactive TGF- $\beta$  that binds to cell-surface receptors to elicit signal transduction. TGF- $\beta$  receptors are transmembrane serine/threonine kinases that include two major types: type I TGF- $\beta$  receptors (T $\beta$ RI) and type II TGF- $\beta$  receptors (T $\beta$ RII) (92). Binding of TGF- $\beta$  to T $\beta$ RII leads to the transactivation of T $\beta$ RI (92) (Figure 4).

TGF- $\beta$  signaling is then subsequently transduced through a group of small intracellular effector proteins known as Smads (Figure 4). Until now, three types of Smads have been identified: (i) receptor-activated Smads, including Smad1, 2, 3, 5 and 8; (ii) a common mediator Smad, i.e. Smad4 and (iii) inhibitory Smads, including Smads 6 and 7 (93). T $\beta$ RI can phosphorylate Smad2 and 3, which form functional heterotrimers with Smad4, respectively, and translocate into the nucleus, where they interact with DNA-binding transcription factors and either activate or repress transcription (94) (Figure 4). TGF- $\beta$ /Smad signaling downregulates zonula occludens 1, claudin 1 and occludin, followed by degradation of tight junctions (95). The epithelial marker E-cadherin is also inhibited by TGF- $\beta$ -mediated Snail1/2, high-mobility group AT-hook 2 and zinc finger E-box-binding homeobox 1/2 activation (96). Moreover, it was demonstrated that TGF- $\beta$  attenuates cell junctions through repressing junctional adhesion molecule-A/B/C and tight junction protein 1/2/3 (97). Collectively, TGF- $\beta$ /Smad signaling inhibits epithelial markers and degrades tight junctions in cancer cells, inducing EMT.

On the other hand, TGF- $\beta$  also elicits signaling responses through other pathways that do not involve Smad signaling (96). The TGF- $\beta$ -mediated activation of these non-Smad signaling pathways, e.g. ERK, c-jun N-terminal kinase/P38 and PI3K/AKT (98), is independent of Smad signaling (Figure 4). Direct activation of non-Smad signaling pathways by TGF- $\beta$  occurs through interactions of signaling mediators either directly with the T $\beta$ RII and/or T $\beta$ RI receptors or through adaptor proteins (98). Among the non-Smad signaling responses, activation of ERK/mitogen-activated protein kinase, Rho GTPases and the PI3K/AKT pathways in response to TGF- $\beta$  has been linked to TGF- $\beta$ -induced EMT through their regulation of distinct processes, such as cytoskeleton organization, cell growth, survival, migration or invasion (96).

Recently, the inhibitory effect of NDRG1 on TGF- $\beta$  signaling has been addressed (39). NDRG1 overexpression maintained epithelial markers E-cadherin and  $\beta$ -catenin and inhibited TGF- $\beta$ -stimulated cell migration and invasion (39). Conversely, NDRG1 knockdown caused morphological changes from epithelial- to fibroblastic-like phenotype and also increased migration and invasion, demonstrating that a reduction in NDRG1 induced the EMT and enhanced the oncogenic effects of TGF- $\beta$  (39). The mechanism behind this observation is likely to involve the downstream targets of the TGF- $\beta$  pathway, namely Smad2, Smad3, Snail and Slug, all of which have been demonstrated to be suppressed at the protein level by NDRG1 expression (Figure 4) (39,47). Collectively, these studies demonstrate that NDRG1 can restrain TGF- $\beta$ -induced EMT, preventing metastasis.

#### NDRG1 and Wnt/ $\beta$ -catenin pathway

Another important signaling pathway that is involved in regulating EMT is the Wnt/ $\beta$ -catenin pathway. Wnt proteins are ~40 kDa in size and are modified by lipids, which are important for Wnt secretion and activation of efficient signaling (99) (Figure 5). Wnt lipids can activate the cell membrane receptor Frizzled, leading to activation of downstream protein Dishevelled. Dishevelled is a key protein that binds to Frizzled-co-receptors namely, the low-density lipoprotein receptor-related protein (LRP) family to transduce signals into the cytosol (100). Activation of canonical Wnt signaling involves phosphorylation of LRP, which then recruits Axin to the receptor complex (101,102) (Figure 5). In addition, Wnt signaling also leads to dephosphorylation and subsequent inactivation of GSK3 $\beta$  (103). Under normal conditions, Axin and pGSK3 $\beta$  form a destruction complex with adenomatous polyposis coli, which functions to phosphorylate  $\beta$ -catenin, leading to its subsequent



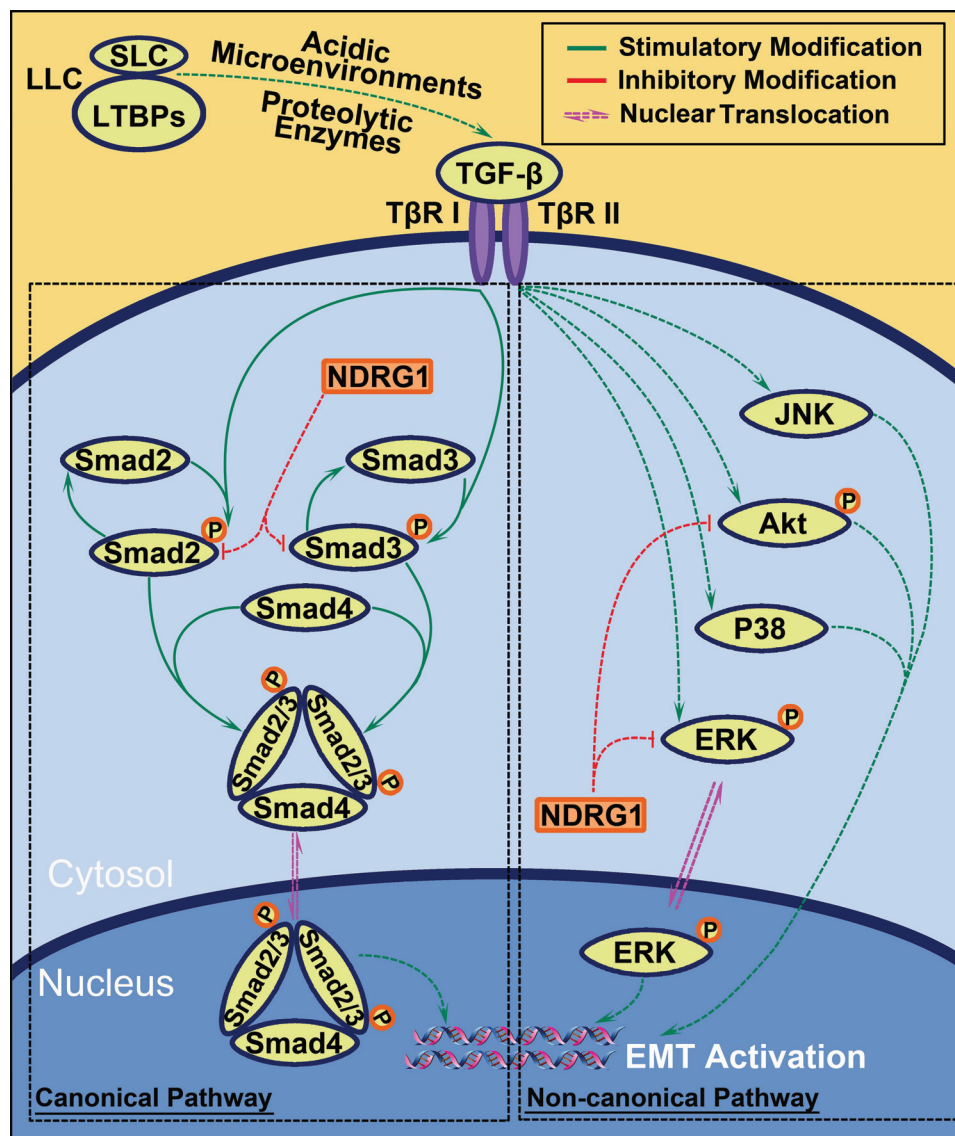

**Fig. 4.** NDRG1 is involved in EMT-associated TGF- $\beta$  signaling. In the presence of acidic microenvironments or activation by proteolytic enzymes, bioactive TGF- $\beta$  binds to cell-surface receptors to elicit signal transduction. There are two major types of TGF- $\beta$  receptors: T $\beta$ R I and T $\beta$ R II. TGF- $\beta$  signaling is then subsequently transduced through either the canonical or the non-canonical pathways. The canonical pathway involves the Smad proteins, which transport the TGF- $\beta$  signal into the nucleus to induce transcription of genes relevant to EMT. On the other hand, the non-canonical TGF- $\beta$  pathway also elicits a signaling response through other pathways that do not involve Smads, e.g. ERK, c-jun N-terminal kinase/P38, PI3K/AKT. Furthermore, NDRG1 antagonizes the TGF- $\beta$ -activated Smad/Snail pathway to inhibit EMT. Full lines represent direct modifications. Dashed lines represent indirect modifications.

degradation *via* the proteasome (100) (Figure 5). However, upon Wnt activation, the recruitment of Axin to the membrane in addition to the dephosphorylation of GSK3 $\beta$  leads to dissociation of the destruction complex (Figure 5) (101–103). As a result,  $\beta$ -catenin escapes phosphorylation and translocates to the nucleus where it interacts with members of the T-cell factor (TCF)/lymphoid enhancer-binding factor family of transcription factors to regulate the expression of certain  $\beta$ -catenin/TCF-responsive target genes (102) (Figure 5). Indeed,  $\beta$ -catenin co-activates the transcription of target genes such as Myc, cyclin D1, TCF-1, peroxisome proliferator-activated receptor- $\delta$ , matrix metalloproteinase 7, Axin-2, CD44 and so on (102). Hence,  $\beta$ -catenin-dependent Wnt signaling governs cell differentiation, proliferation, apoptosis and EMT, depending on the cellular context and the surrounding microenvironment (101,102).

When expressed at the cell membrane,  $\beta$ -catenin can bind to E-cadherin to form an E-cadherin/ $\beta$ -catenin complex, which plays an important role in cell adhesion (104). In hepatic cell carcinoma

patients, the reduced expression of E-cadherin was accompanied by (partial) nuclear translocation of  $\beta$ -catenin and significantly correlated with intrahepatic metastasis and poor survival (105). This indicates the important role of nuclear  $\beta$ -catenin in facilitating disease progression.

It was recently demonstrated that NDRG1 interacts with the Wnt receptor, LRP6, leading to blocking of the Wnt signaling pathway (40) (Figure 5). Furthermore, the Wnt/NDRG1/LRP6 signature was also considered to be a strong predictable marker for recurrence-free survival of cancer patients (40). Hence, NDRG1 is proposed to be a novel negative master regulator of Wnt signaling during metastatic progression (40). It was also reported that NDRG1 can inhibit nuclear translocation of  $\beta$ -catenin while promoting its localization in the membrane (39,40). Moreover, NDRG1 was found to be a substrate for GSK3 $\beta$ , indicating its potential interactions with GSK3 $\beta$ -induced pathways in EMT (106) (Figure 5). Although the detailed mechanisms remain elusive, these studies clearly demonstrated that NDRG1 interacts with the Wnt/ $\beta$ -catenin pathway to regulate EMT.

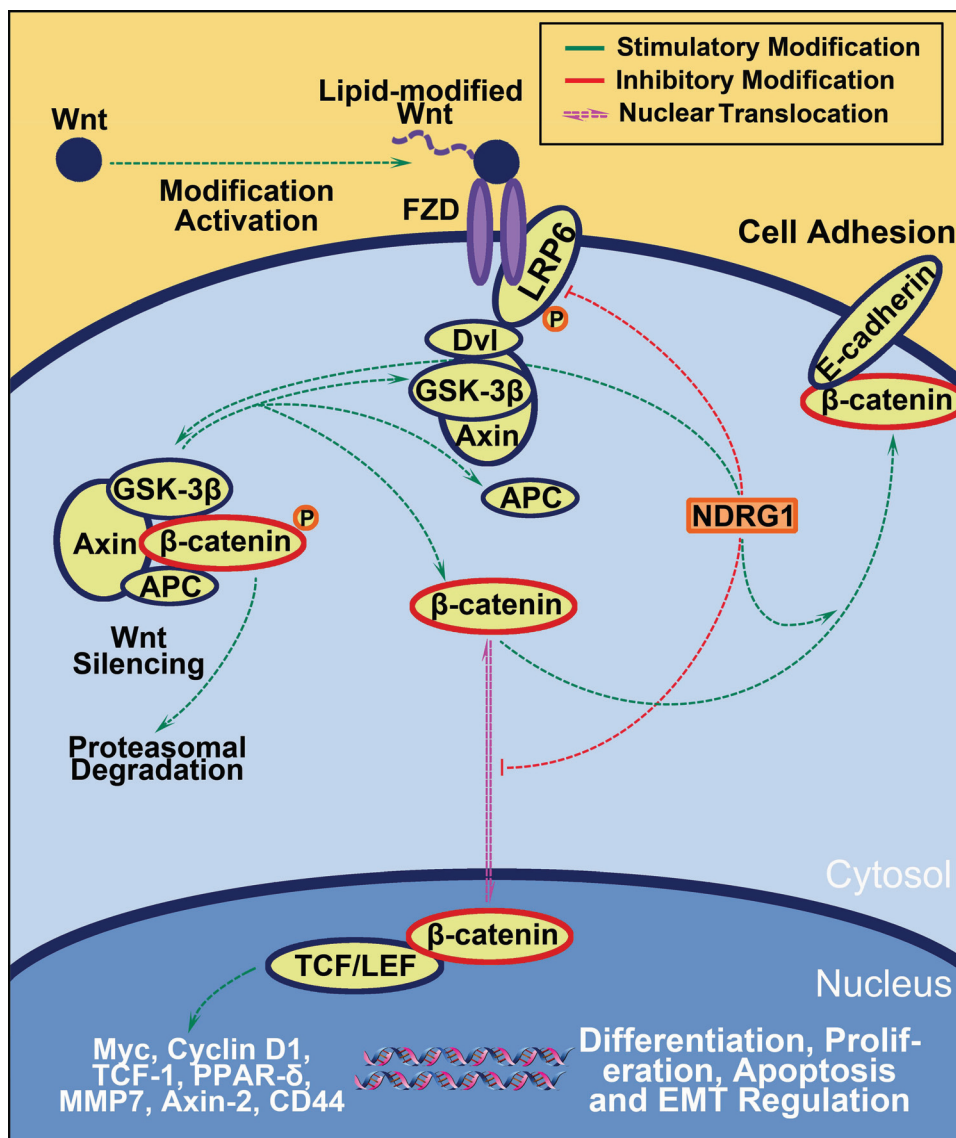

**Fig. 5.** NDRG1 is involved in EMT-associated Wnt/ $\beta$ -catenin signaling. Wnt signaling promotes the stabilization and nuclear localization of  $\beta$ -catenin. In the absence of a canonical Wnt signal, cytoplasmic  $\beta$ -catenin turns over rapidly, being phosphorylated by the constitutively active Axin/adenomatous polyposis coli/pGSK3 $\beta$  complex and subsequently degraded *via* the proteasome. Although Wnt is activated, cytoplasmic  $\beta$ -catenin escapes from phosphorylation and degradation. It then translocates to the nucleus, where it forms a complex with TCF/lymphoid enhancer-binding factor to regulate expression of genes that promote EMT and metastasis. Moreover, NDRG1 interacts with LRP6 and GSK3 $\beta$ , leading to blocking of the Wnt signaling pathway. Full lines represent direct modifications. Dashed lines represent indirect modifications.

**NDRG1 and its effect on molecular motors involved in cancer cell migration**

Cancer cell migration is a key process in cancer metastasis. It is driven by the activation of molecular motors that leads to polymerization of actin filaments, increased stress fiber synthesis and activation of actin-skeleton dynamics (107).

*Actin-skeleton signaling and molecular motors*

The cellular skeleton protein, actin, participates in cell motility, cell shape maintenance, polarity, cell junction function and chemotaxis, all of which are important events in cellular locomotion (108). Actin proteins exist in the cytoplasm in two different forms, namely the actin monomer (G-actin) and actin filament (F-actin). When G-actin exchanges bound adenosine diphosphate for adenosine triphosphate, it can be activated and polymerizes into F-actin bundles (108). Once actin monomers polymerize into filaments, a series of proteins and signaling pathways are activated to modify these filaments (Figure 6).

There are two groups of functional proteins regulating the polymerization process: polymerization promoters and capping proteins (109). Promoters include actin nucleators, e.g. formin and actin-related protein 2/3 (Arp 2/3) (109,110). Formins, regulated by adenomatous polyposis coli and Rho-guanine nucleotide exchange factors (111,112), are a group of multimodular proteins that bind to and regulate the stability of profilin, which is involved in the dynamic turnover and restructuring of the actin cytoskeleton (109) (Figure 6). The Arp 2/3 complex is a hetero-heptamer that promotes actin polymerization (110). The Arp 2/3 complex is activated by the Wiskott–Aldrich syndrome family protein (WASP) family of proteins (e.g. neural WASP), WASP family Verprolin-homologous protein (WAVE) and WASP and Scar homolog protein (WASH), which are activated by small Rho GTPases such as cell division control protein 42 homolog (Cdc42) and Ras-related C3 botulinum toxin substrate 1 *via* phosphorylation (113). On the contrary, actin capping proteins terminate elongation, thereby limiting polymerization of new filaments (114). The gelsolin and villin proteins cause calcium-dependent



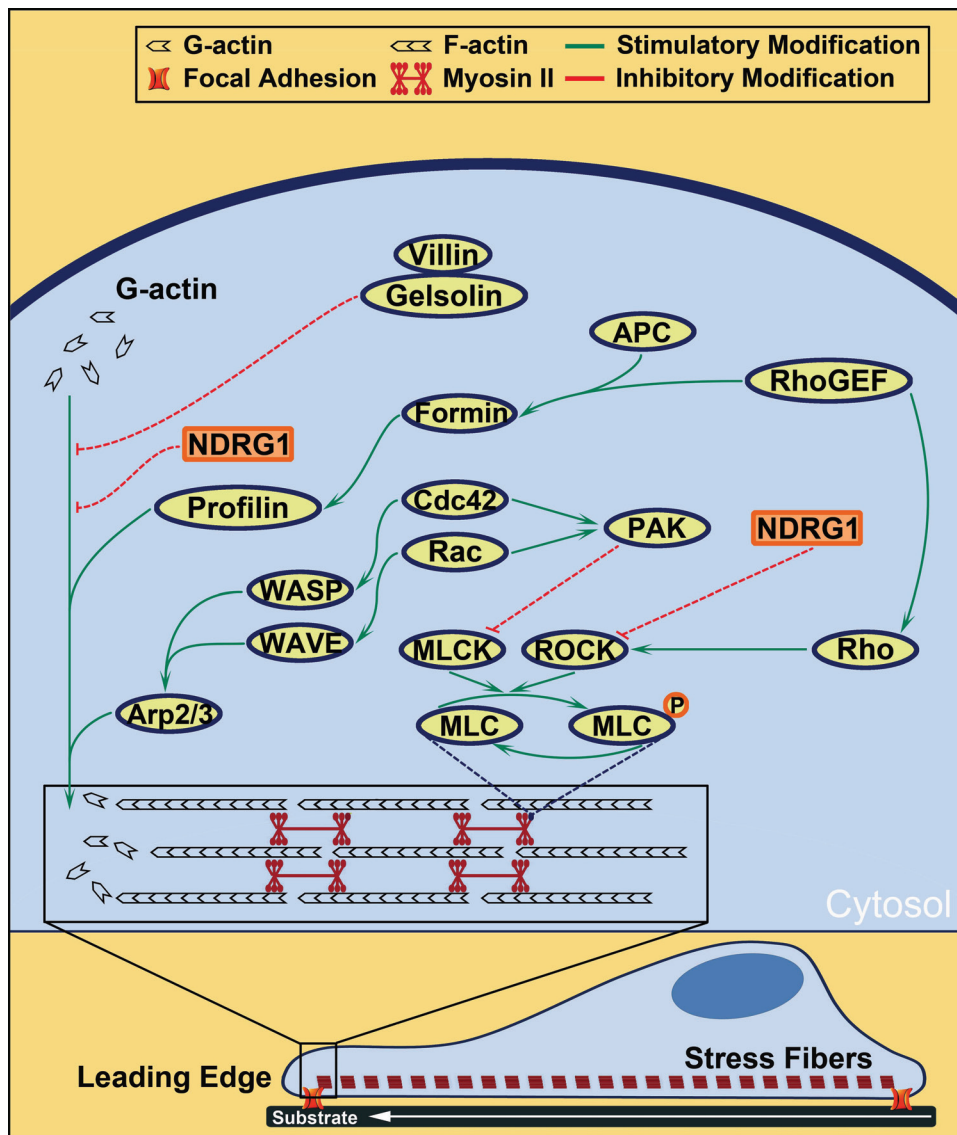

**Fig. 6.** Actin-skeleton dynamics and signaling pathway: potential cascades that NDRG1 may be involved in. Actin polymerization is regulated by a series of proteins and signaling pathways. There are two groups of functional proteins regulating the polymerization process: polymerization promoters (e.g. formins and Arps 2/3 complex) and capping proteins (e.g. gelsolin and villin). Moreover, actin filaments together with myosin II filaments form stress fibers, which play key roles in cancer cell motility. The key factor in the formation and contractility of the stress fibers is the phosphorylation of MLC. The small Rho-GTPase family is a typical molecular motor involved in regulating stress fiber formation, contraction and cell motility. Full lines represent direct modifications. Dashed lines represent indirect modifications.

fragmentation of actin filaments and are also capable of capping the filament barbed end (115).

Actin filaments together with myosin II filaments form contractile actomyosin structures in cells, regulating cell movement during the migration process (87). Stress fibers are one of the contractile actomyosin structures, which play key roles in cancer cell motility (87). When a cancer cell makes stable associations to a substrate or its potential metastasis signaling is triggered by activators (e.g. transcription factors, chemotactic factors and so on), stress fibers are rearranged and extend within the cell (116). The myosin interacts with F-actin to drive the movement of actin filaments past one another and the contraction of the fiber, causing alterations in cell shape and cellular migration (117). Furthermore, it is reported that the key factor in the formation and contractility of the stress fibers is the phosphorylation of MLC at Thr18/Ser19 (118) (Figure 6).

Hence, the signaling pathways that regulate MLC phosphorylation are able to mediate stress fiber formation and contractility (117) (Figure 6). The small Rho-GTPase family is a typical molecular

motor involved in regulating stress fiber formation, contraction and cell motility (118). As a subgroup of the Ras superfamily of GTPases, Rho family GTPases have a close interaction with the PI3K signaling pathway (119). Rho-guanine nucleotide exchange factor activates monomeric GTPases by stimulating the release of guanosine diphosphate to allow binding of GTP to GTPase (120,121). In addition, GTPases, which were shown to regulate actin dynamics, were reported to be closely correlated with progression of many cancer types (122). There are three well-established members in the small Rho-GTPase family: Rho protein, cell division control protein 42 and Ras-related C3 botulinum toxin substrate 1 (123). Rho can activate its effector Rho-associated, coiled-coil containing protein kinase, which can induce membrane protrusions and cancer cell migration *via* phosphorylation of MLC (124). Both cell division control protein 42 and Rac can activate p21-activated kinase, which can inhibit MLC kinase-mediated phosphorylation (125,126). Collectively, the Rho-GTPase family acts as linking molecules in the signaling networks controlling cancer migration and metastasis.

*NDRG1 and molecular motors*

Recent studies have revealed a significant inhibitory effect of NDRG1 on cancer cell migration and invasion *via* antagonizing TGF- $\beta$  in human prostate and colorectal cancer cells (39). NDRG1 may also interact with caveolin 1, which is involved in TGF- $\beta$ -mediated EMT and integrin-associated cell adhesion in cancer (127). Although molecular motors drive cancer metastasis and NDRG1 functions as a metastasis suppressor, it is possible that NDRG1 can modulate the molecular motors mentioned above.

Indeed, our recent investigations demonstrated that NDRG1 inhibits actin filament polymerization, stress fiber assembly and cell migration *via* the Rho-associated, coiled-coil containing protein kinase 1/pMLC2 pathway in prostate and colorectal cancer cells (128). These results suggest that NDRG1 functions to inhibit metastasis by regulating the molecular motors and stress fiber assembly (Figure 6).

In summary, the metastasis suppressor, NDRG1, interacts with key signaling pathways to inhibit cancer progression and metastasis. Elucidating the molecular mechanisms that underlie the antimetastatic effects of NDRG1 may lead to the development of new therapies to inhibit cancer metastasis.

**Acknowledgements**

We thank Ms G.Y.L.Lui, Dr V.Richardson and Dr T.Yamagishi for their careful assessment of the manuscript prior to submission. D.R.R. is thankful to the National Health and Medical Research Council of Australia (NHMRC) for a Senior Principal Research Fellowship and project grants. Z.K. appreciates fellowship support from the NHMRC and also the Cancer Institute New South Wales.

*Conflict of Interest Statement:* None declared.

**References**

- Kovacevic,Z. *et al.* (2006) The metastasis suppressor, NdrG-1: a new ally in the fight against cancer. *Carcinogenesis*, **27**, 2355–2366.
- Motwani,M. *et al.* (2002) Drg1, a novel target for modulating sensitivity to CPT-11 in colon cancer cells. *Cancer Res.*, **62**, 3950–3955.
- Shah,M.A. *et al.* (2005) Drg1 expression in 131 colorectal liver metastases: correlation with clinical variables and patient outcomes. *Clin. Cancer Res.*, **11**, 3296–3302.
- Park,H. *et al.* (2000) Hypoxia induces the expression of a 43-kDa protein (PROXY-1) in normal and malignant cells. *Biochem. Biophys. Res. Commun.*, **276**, 321–328.
- Sun,B. *et al.* (2009) Decreased expression of NDRG1 in glioma is related to tumor progression and survival of patients. *J. Neurooncol.*, **94**, 213–219.
- Kovacevic,Z. *et al.* (2008) The iron-regulated metastasis suppressor, NdrG-1: identification of novel molecular targets. *Biochim. Biophys. Acta*, **1783**, 1981–1992.
- Ellen,T.P. *et al.* (2008) NDRG1, a growth and cancer related gene: regulation of gene expression and function in normal and disease states. *Carcinogenesis*, **29**, 2–8.
- Zhao,G. *et al.* (2011) Identification of NDRG1-regulated genes associated with invasive potential in cervical and ovarian cancer cells. *Biochem. Biophys. Res. Commun.*, **408**, 154–159.
- Bandyopadhyay,S. *et al.* (2004) Role of the putative tumor metastasis suppressor gene Drg-1 in breast cancer progression. *Oncogene*, **23**, 5675–5681.
- Cheng,J. *et al.* (2011) NDRG1 as a biomarker for metastasis, recurrence and of poor prognosis in hepatocellular carcinoma. *Cancer Lett.*, **310**, 35–45.
- Said,H.M. *et al.* (2009) Oxygen-dependent regulation of NDRG1 in human glioblastoma cells *in vitro* and *in vivo*. *Oncol. Rep.*, **21**, 237–246.
- Fotovati,A. *et al.* (2011) N-myc downstream-regulated gene 1 (NDRG1) a differentiation marker of human breast cancer. *Pathol. Oncol. Res.*, **17**, 525–533.
- Tschan,M.P. *et al.* (2010) NDRG1/2 expression is inhibited in primary acute myeloid leukemia. *Leuk. Res.*, **34**, 393–398.
- Zhou,R.H. *et al.* (2001) Characterization of the human NDRG gene family: a newly identified member, NDRG4, is specifically expressed in brain and heart. *Genomics*, **73**, 86–97.
- Maruyama,Y. *et al.* (2006) Tumor growth suppression in pancreatic cancer by a putative metastasis suppressor gene Cap43/NDRG1/Drg-1 through modulation of angiogenesis. *Cancer Res.*, **66**, 6233–6242.
- Angst,E. *et al.* (2006) Cellular differentiation determines the expression of the hypoxia-inducible protein NDRG1 in pancreatic cancer. *Br. J. Cancer*, **95**, 307–313.
- King,R.H. *et al.* (2011) NdrG1 in development and maintenance of the myelin sheath. *Neurobiol. Dis.*, **42**, 368–380.
- Li,Q. *et al.* (2011) Transcriptional silencing of N-Myc downstream-regulated gene 1 (NDRG1) in metastatic colon cancer cell line SW620. *Clin. Exp. Metastasis*, **28**, 127–135.
- Li,J. *et al.* (2003) The growth-inhibitory NdrG1 gene is a Myc negative target in human neuroblastomas and other cell types with overexpressed N- or c-myc. *Mol. Cell. Biochem.*, **250**, 91–105.
- Masuda,K. *et al.* (2003) Downregulation of Cap43 gene by von Hippel-Lindau tumor suppressor protein in human renal cancer cells. *Int. J. Cancer*, **105**, 803–810.
- Toffoli,S. *et al.* (2009) NDRG1 and CRK-I/II are regulators of endothelial cell migration under Intermittent Hypoxia. *Angiogenesis*, **12**, 339–354.
- Cangul,H. (2004) Hypoxia upregulates the expression of the NDRG1 gene leading to its overexpression in various human cancers. *BMC Genet.*, **5**, 27.
- Hickok,J.R. *et al.* (2011) Nitric oxide suppresses tumor cell migration through N-Myc downstream-regulated gene-1 (NDRG1) expression: role of chelatable iron. *J. Biol. Chem.*, **286**, 41413–41424.
- Zheng,Y. *et al.* (2009) NDRG1 is down-regulated in the early apoptotic event induced by camptothecin analogs: the potential role in proteolytic activation of PKC delta and apoptosis. *Proteomics*, **9**, 2064–2075.
- Stein,S. *et al.* (2004) NDRG1 is necessary for p53-dependent apoptosis. *J. Biol. Chem.*, **279**, 48930–48940.
- Zhang,A.H. *et al.* (2007) p53-dependent NDRG1 expression induces inhibition of intestinal epithelial cell proliferation but not apoptosis after polyamine depletion. *Am. J. Physiol. Cell Physiol.*, **293**, C379–C389.
- Bandyopadhyay,S. *et al.* (2006) The tumor metastasis suppressor gene Drg-1 down-regulates the expression of activating transcription factor 3 in prostate cancer. *Cancer Res.*, **66**, 11983–11990.
- Matsugaki,T. *et al.* (2010) N-myc downstream-regulated gene 1/Cap43 expression promotes cell differentiation of human osteosarcoma cells. *Oncol. Rep.*, **24**, 721–725.
- Chua,H.L. *et al.* (2007) NF-kappaB represses E-cadherin expression and enhances epithelial to mesenchymal transition of mammary epithelial cells: potential involvement of ZEB-1 and ZEB-2. *Oncogene*, **26**, 711–724.
- McCaig,C. *et al.* (2011) Phosphorylation of NDRG1 is temporally and spatially controlled during the cell cycle. *Biochem. Biophys. Res. Commun.*, **411**, 227–234.
- Lachat,P. *et al.* (2002) Expression of NDRG1, a differentiation-related gene, in human tissues. *Histochem. Cell Biol.*, **118**, 399–408.
- Chen,S. *et al.* (2009) NDRG1 contributes to retinoic acid-induced differentiation of leukemic cells. *Leuk. Res.*, **33**, 1108–1113.
- Nagai,M.A. *et al.* (2011) Prognostic value of NDRG1 and SPARC protein expression in breast cancer patients. *Breast Cancer Res. Treat.*, **126**, 1–14.
- Nishio,S. *et al.* (2008) Cap43/NDRG1/Drg-1 is a molecular target for angiogenesis and a prognostic indicator in cervical adenocarcinoma. *Cancer Lett.*, **264**, 36–43.
- Sugiki,T. *et al.* (2004) N-myc downregulated gene 1 is a phosphorylated protein in mast cells. *Biol. Pharm. Bull.*, **27**, 624–627.
- Liang,S.X. *et al.* (2003) The effect of potent iron chelators on the regulation of p53: examination of the expression, localization and DNA-binding activity of p53 and the transactivation of WAF1. *Carcinogenesis*, **24**, 1601–1614.
- Le,N.T. *et al.* (2003) Potent iron chelators increase the mRNA levels of the universal cyclin-dependent kinase inhibitor p21(CIP1/WAF1), but paradoxically inhibit its translation: a potential mechanism of cell cycle dysregulation. *Carcinogenesis*, **24**, 1045–1058.
- Kurdستاني,S.K. *et al.* (1998) Inhibition of tumor cell growth by RTP/rit42 and its responsiveness to p53 and DNA damage. *Cancer Res.*, **58**, 4439–4444.
- Chen,Z. *et al.* (2012) The iron chelators Dp44mT and DFO inhibit TGF- $\beta$ -induced epithelial-mesenchymal transition via up-regulation of N-Myc downstream-regulated gene 1 (NDRG1). *J. Biol. Chem.*, **287**, 17016–17028.
- Liu,W. *et al.* (2012) N-myc downstream regulated gene 1 modulates Wnt- $\beta$ -catenin signalling and pleiotropically suppresses metastasis. *EMBO Mol. Med.*, **4**, 93–108.

41. Yan, X. *et al.* (2008) N-Myc down-regulated gene 1 mediates proliferation, invasion, and apoptosis of hepatocellular carcinoma cells. *Cancer Lett.*, **262**, 133–142.
42. Liu, W. *et al.* (2011) KAI1 gene is engaged in NDRG1 gene-mediated metastasis suppression through the ATF3-NF-kappaB complex in human prostate cancer. *J. Biol. Chem.*, **286**, 18949–18959.
43. Hosoi, F. *et al.* (2009) N-myc downstream regulated gene 1/Cap43 suppresses tumor growth and angiogenesis of pancreatic cancer through attenuation of inhibitor of kappaB kinase beta expression. *Cancer Res.*, **69**, 4983–4991.
44. Bandyopadhyay, S. *et al.* (2004) PTEN up-regulates the tumor metastasis suppressor gene Drg-1 in prostate and breast cancer. *Cancer Res.*, **64**, 7655–7660.
45. He, J. *et al.* (2010) The p85beta regulatory subunit of PI3K serves as a substrate for PTEN protein phosphatase activity during insulin mediated signaling. *Biochem. Biophys. Res. Commun.*, **397**, 513–519.
46. Pearce, L.R. *et al.* (2011) Protor-1 is required for efficient mTORC2-mediated activation of SGK1 in the kidney. *Biochem. J.*, **436**, 169–179.
47. Kovacevic, Z. *et al.* (2013) The iron-regulated metastasis suppressor NDRG1 targets NEDD4L, PTEN, and SMAD4 and inhibits the PI3K and Ras signaling pathways. *Antioxid. Redox Signal.*, **18**, 874–887.
48. Brasier, A.R. (2006) The NF-kappaB regulatory network. *Cardiovasc. Toxicol.*, **6**, 111–130.
49. Ghosh, S. *et al.* (2002) Missing pieces in the NF-kappaB puzzle. *Cell*, **109**, S81–S96.
50. Wilczynski, J. *et al.* (2011) Targeting NF-kB and HIF-1 pathways for the treatment of cancer: part II. *Arch. Immunol. Ther. Exp. (Warsz.)*, **59**, 301–307.
51. Wilken, R. *et al.* (2011) Curcumin: a review of anti-cancer properties and therapeutic activity in head and neck squamous cell carcinoma. *Mol. Cancer*, **10**, 12.
52. Tong, Y. *et al.* (2012) Enhanced TLR-induced NF-kB signaling and type I interferon responses in NLR5 deficient mice. *Cell Res.*, **22**, 822–835.
53. Wu, Y. *et al.* (2010) TNF-alpha/NF-kappaB/Snail pathway in cancer cell migration and invasion. *Br. J. Cancer*, **102**, 639–644.
54. Pham, C.G. *et al.* (2007) Upregulation of Twist-1 by NF-kappaB blocks cytotoxicity induced by chemotherapeutic drugs. *Mol. Cell. Biol.*, **27**, 3920–3935.
55. Moreau, M. *et al.* (2011) beta-Catenin and NF-kB cooperate to regulate the uPA/uPAR system in cancer cells. *Int. J. Cancer*, **128**, 1280–1292.
56. Farina, A.R. *et al.* (2011) Thioredoxin stimulates MMP-9 expression, de-regulates the MMP-9/TIMP-1 equilibrium and promotes MMP-9 dependent invasion in human MDA-MB-231 breast cancer cells. *FEBS Lett.*, **585**, 3328–3336.
57. Lu, Y. *et al.* (2012) Apelin-APJ induces ICAM-1, VCAM-1 and MCP-1 expression via NF-kB/JNK signal pathway in human umbilical vein endothelial cells. *Amino Acids*, **43**, 2125–2136.
58. Stanisavljevic, J. *et al.* (2011) The p65 subunit of NF-kB and PARP1 assist Snail1 in activating fibronectin transcription. *J. Cell Sci.*, **124**(Pt 24), 4161–4171.
59. Hada, N. *et al.* (2012) Receptor activator of NF-kB ligand-dependent expression of caveolin-1 in osteoclast precursors, and high dependency of osteoclastogenesis on exogenous lipoprotein. *Bone*, **50**, 226–236.
60. Wu, X. *et al.* (2009) TNF induces caspase-dependent inflammation in renal endothelial cells through a Rho- and myosin light chain kinase-dependent mechanism. *Am. J. Physiol. Renal Physiol.*, **297**, F316–F326.
61. Jeon, H.G. *et al.* (2011) Induction of caspase mediated apoptosis and down-regulation of nuclear factor-kB and Akt signaling are involved in the synergistic antitumor effect of gemcitabine and the histone deacetylase inhibitor trichostatin A in human bladder cancer cells. *J. Urol.*, **186**, 2084–2093.
62. Chi, F. *et al.* (2012) Vimentin and PSF act in concert to regulate IbaA+ E. coli K1 induced activation and nuclear translocation of NF-kB in human brain endothelial cells. *PLoS One*, **7**, e35862.
63. Wilson, C. *et al.* (2008) Chemotherapy-induced CXC-chemokine/CXC-chemokine receptor signaling in metastatic prostate cancer cells confers resistance to oxaliplatin through potentiation of nuclear factor-kappaB transcription and evasion of apoptosis. *J. Pharmacol. Exp. Ther.*, **327**, 746–759.
64. Murakami, Y. *et al.* (2010) Identification of sites subjected to serine/threonine phosphorylation by SGK1 affecting N-myc downstream-regulated gene 1 (NDRG1)/Cap43-dependent suppression of angiogenic CXC chemokine expression in human pancreatic cancer cells. *Biochem. Biophys. Res. Commun.*, **396**, 376–381.
65. Carnero, A. *et al.* (2008) The PTEN/PI3K/AKT signalling pathway in cancer, therapeutic implications. *Curr. Cancer Drug Targets*, **8**, 187–198.
66. Engelman, J.A. (2009) Targeting PI3K signalling in cancer: opportunities, challenges and limitations. *Nat. Rev. Cancer*, **9**, 550–562.
67. Katso, R. *et al.* (2001) Cellular function of phosphoinositide 3-kinases: implications for development, homeostasis, and cancer. *Annu. Rev. Cell Dev. Biol.*, **17**, 615–675.
68. Cantley, L.C. (2002) The phosphoinositide 3-kinase pathway. *Science*, **296**, 1655–1657.
69. McDonald, P.C. *et al.* (2008) Rictor and integrin-linked kinase interact and regulate Akt phosphorylation and cancer cell survival. *Cancer Res.*, **68**, 1618–1624.
70. Yoshida, S. *et al.* (2011) Redox regulates mammalian target of rapamycin complex 1 (mTORC1) activity by modulating the TSC1/TSC2-Rheb GTPase pathway. *J. Biol. Chem.*, **286**, 32651–32660.
71. Dixon, K.M. *et al.* (2013) Dp44mT targets the AKT, TGF-beta and ERK pathways via the metastasis suppressor NDRG1 in normal prostate epithelial cells and prostate cancer cells. *Br. J. Cancer*, **108**, 409–419.
72. Steelman, L.S. *et al.* (2011) Roles of the Ras/Raf/MEK/ERK pathway in leukemia therapy. *Leukemia*, **25**, 1080–1094.
73. Bao, X.H. *et al.* (2012) Esophageal cancer exhibits resistance to a novel IGF-1R inhibitor NVP-AEW541 with maintained RAS-MAPK activity. *Anticancer Res.*, **32**, 2827–2834.
74. Fucini, R.V. *et al.* (1999) Insulin-induced desensitization of extracellular signal-regulated kinase activation results from an inhibition of Raf activity independent of Ras activation and dissociation of the Grb2-SOS complex. *J. Biol. Chem.*, **274**, 18651–18658.
75. Hurley, J.B. *et al.* (1984) Homologies between signal transducing G proteins and ras gene products. *Science*, **226**, 860–862.
76. Marais, R. *et al.* (1995) Ras recruits Raf-1 to the plasma membrane for activation by tyrosine phosphorylation. *EMBO J.*, **14**, 3136–3145.
77. McCubrey, J.A. *et al.* (2008) Targeting survival cascades induced by activation of Ras/Raf/MEK/ERK, PI3K/PTEN/Akt/mTOR and Jak/STAT pathways for effective leukemia therapy. *Leukemia*, **22**, 708–722.
78. Tyner, J.W. *et al.* (2009) High-throughput sequencing screen reveals novel, transforming RAS mutations in myeloid leukemia patients. *Blood*, **113**, 1749–1755.
79. Iglesias, M. *et al.* (2000) Blockade of Smad4 in transformed keratinocytes containing a Ras oncogene leads to hyperactivation of the Ras-dependent Erk signalling pathway associated with progression to undifferentiated carcinomas. *Oncogene*, **19**, 4134–4145.
80. Mendoza, M.C. *et al.* (2011) The Ras-ERK and PI3K-mTOR pathways: cross-talk and compensation. *Trends Biochem. Sci.*, **36**, 320–328.
81. Arnaud, M. *et al.* (2004) Phosphorylation of Grb2-associated binder 2 on serine 623 by ERK MAPK regulates its association with the phosphatase SHP-2 and decreases STAT5 activation. *J. Immunol.*, **173**, 3962–3971.
82. Carr, B.I. *et al.* (2011) c-Met-Akt pathway-mediated enhancement of inhibitory c-Raf phosphorylation is involved in vitamin K1 and sorafenib synergy on HCC growth inhibition. *Cancer Biol. Ther.*, **12**, 531–538.
83. Zoncu, R. *et al.* (2011) mTOR: from growth signal integration to cancer, diabetes and ageing. *Nat. Rev. Mol. Cell Biol.*, **12**, 21–35.
84. Reddy, V.S. *et al.* (2008) Interleukin-18 stimulates fibronectin expression in primary human cardiac fibroblasts via PI3K-Akt-dependent NF-kappaB activation. *J. Cell. Physiol.*, **215**, 697–707.
85. Nisticò, P. *et al.* (2012) Epithelial-mesenchymal transition: general principles and pathological relevance with special emphasis on the role of matrix metalloproteinases. *Cold Spring Harb. Perspect. Biol.*, **4**, a011908.
86. Zhang, K. *et al.* (2009) Cortactin is involved in transforming growth factor-beta1-induced epithelial-mesenchymal transition in AML-12 cells. *Acta Biochim. Biophys. Sin. (Shanghai)*, **41**, 839–845.
87. Tojkander, S. *et al.* (2012) Actin stress fibers—assembly, dynamics and biological roles. *J. Cell Sci.*, **125**(Pt 8), 1855–1864.
88. Kalluri, R. *et al.* (2009) The basics of epithelial-mesenchymal transition. *J. Clin. Invest.*, **119**, 1420–1428.
89. Voulgari, A. *et al.* (2009) Epithelial-mesenchymal transition in cancer metastasis: mechanisms, markers and strategies to overcome drug resistance in the clinic. *Biochim. Biophys. Acta*, **1796**, 75–90.
90. Parvani, J.G. *et al.* (2011) Noncanonical TGF-beta signaling during mammary tumorigenesis. *J. Mammary Gland Biol. Neoplasia*, **16**, 127–146.
91. Koli, K. *et al.* (2001) Latency, activation, and binding proteins of TGF-beta. *Microsc. Res. Tech.*, **52**, 354–362.
92. Huang, T. *et al.* (2011) TGF-beta signalling is mediated by two autonomously functioning TbetaRI: TbetaRII pairs. *EMBO J.*, **30**, 1263–1276.
93. Samanta, D. *et al.* (2012) Alterations in the Smad pathway in human cancers. *Front. Biosci.*, **17**, 1281–1293.
94. Matsuzaki, K. *et al.* (2009) Smad2 and Smad3 phosphorylated at both linker and COOH-terminal regions transmit malignant TGF-beta signal in later stages of human colorectal cancer. *Cancer Res.*, **69**, 5321–5330.



95. Moustakas, A. *et al.* (2007) Signaling networks guiding epithelial-mesenchymal transitions during embryogenesis and cancer progression. *Cancer Sci.*, **98**, 1512–1520.
96. Xu, J. *et al.* (2009) TGF-beta-induced epithelial to mesenchymal transition. *Cell Res.*, **19**, 156–172.
97. Ye, P. (2012) Modulation of epithelial tight junctions by TGF-beta 3 in cultured oral epithelial cells. *Aust. Dent. J.*, **57**, 11–17.
98. Zhang, Y.E. (2009) Non-Smad pathways in TGF-beta signaling. *Cell Res.*, **19**, 128–139.
99. Franch-Marro, X. *et al.* (2008) *In vivo* role of lipid adducts on Wingless. *J. Cell Sci.*, **121**(Pt 10), 1587–1592.
100. Kolligs, F.T. *et al.* (2002) Wnt/beta-catenin/tcf signaling: a critical pathway in gastrointestinal tumorigenesis. *Digestion*, **66**, 131–144.
101. Angers, S. *et al.* (2009) Proximal events in Wnt signal transduction. *Nat. Rev. Mol. Cell Biol.*, **10**, 468–477.
102. Clevers, H. *et al.* (2012) Wnt/ $\beta$ -catenin signaling and disease. *Cell*, **149**, 1192–1205.
103. Mitra, A. *et al.* (2012) DNAJB6 chaperones PP2A mediated dephosphorylation of GSK3 $\beta$  to downregulate  $\beta$ -catenin transcription target, osteopontin. *Oncogene*, **31**, 4472–4483.
104. Hsu, Y.M. *et al.* (2007) KCl cotransporter-3 down-regulates E-cadherin/ $\beta$ -catenin complex to promote epithelial-mesenchymal transition. *Cancer Res.*, **67**, 11064–11073.
105. Zhai, B. *et al.* (2008) Reduced expression of E-cadherin/catenin complex in hepatocellular carcinomas. *World J. Gastroenterol.*, **14**, 5665–5673.
106. Murray, J.T. *et al.* (2004) Exploitation of KESTREL to identify NDRG family members as physiological substrates for SGK1 and GSK3. *Biochem. J.*, **384**, 477–488.
107. Vicente-Manzanares, M. *et al.* (2011) Cell migration: an overview. *Methods Mol. Biol.*, **769**, 1–24.
108. Dominguez, R. *et al.* (2011) Actin structure and function. *Annu. Rev. Biophys.*, **40**, 169–186.
109. Blanchoin, L. *et al.* (2012) Actin cytoskeleton: a team effort during actin assembly. *Curr. Biol.*, **22**, R643–R645.
110. Frank, D.J. *et al.* (2006) Capping protein and the Arp2/3 complex regulate nonbundle actin filament assembly to indirectly control actin bundle positioning during *Drosophila melanogaster* bristle development. *Mol. Biol. Cell*, **17**, 3930–3939.
111. Vlahou, G. *et al.* (2006) Rho GTPase signaling in *Dictyostelium discoideum*: insights from the genome. *Eur. J. Cell Biol.*, **85**, 947–959.
112. Webb, R.L. *et al.* (2009) A novel role for an APC2-Diaphanous complex in regulating actin organization in *Drosophila*. *Development*, **136**, 1283–1293.
113. Takenawa, T. *et al.* (2007) The WASP-WAVE protein network: connecting the membrane to the cytoskeleton. *Nat. Rev. Mol. Cell Biol.*, **8**, 37–48.
114. Schafer, D.A. *et al.* (1996) Dynamics of capping protein and actin assembly *in vitro*: uncapping barbed ends by polyphosphoinositides. *J. Cell Biol.*, **135**, 169–179.
115. Weeds, A.G. *et al.* (1986) Preparation and characterization of pig plasma and platelet gelsolins. *Eur. J. Biochem.*, **161**, 69–76.
116. Gervasi, M. *et al.* (2012) JunB contributes to Id2 repression and the epithelial-mesenchymal transition in response to transforming growth factor- $\beta$ . *J. Cell Biol.*, **196**, 589–603.
117. Shutova, M. *et al.* (2012) Functions of nonmuscle myosin II in assembly of the cellular contractile system. *PLoS One*, **7**, e40814.
118. Katoh, K. *et al.* (2011) Rho-associated kinase-dependent contraction of stress fibres and the organization of focal adhesions. *J. R. Soc. Interface*, **8**, 305–311.
119. Xue, Y. *et al.* (2011) Phosphatidylinositol 3'-kinase signaling pathway is essential for Rac1-induced hypoxia-inducible factor-1(alpha) and vascular endothelial growth factor expression. *Am. J. Physiol. Heart Circ. Physiol.*, **300**, H2169–H2176.
120. Lu, Q. *et al.* (2009) Signaling through Rho GTPase pathway as viable drug target. *Curr. Med. Chem.*, **16**, 1355–1365.
121. Gregory, S.L. *et al.* (2010) Signalling through the RhoGEF Pebble in *Drosophila*. *IUBMB Life*, **62**, 290–295.
122. Rathinam, R. *et al.* (2011) Role of Rho GTPases and their regulators in cancer progression. *Front. Biosci.*, **16**, 2561–2571.
123. Boureux, A. *et al.* (2007) Evolution of the Rho family of ras-like GTPases in eukaryotes. *Mol. Biol. Evol.*, **24**, 203–216.
124. Amano, M. *et al.* (1996) Phosphorylation and activation of myosin by Rho-associated kinase (Rho-kinase). *J. Biol. Chem.*, **271**, 20246–20249.
125. Vidal, C. *et al.* (2002) Cdc42/Rac1-dependent activation of the p21-activated kinase (PAK) regulates human platelet lamellipodia spreading: implication of the cortical-actin binding protein cortactin. *Blood*, **100**, 4462–4469.
126. Wirth, A. *et al.* (2003) Inhibition of contraction and myosin light chain phosphorylation in guinea-pig smooth muscle by p21-activated kinase 1. *J. Physiol.*, **549**, 489–500.
127. Ifere, G.O. *et al.* (2010) Cholesterol and phytosterols differentially regulate the expression of caveolin 1 and a downstream prostate cell growth-suppressor gene. *Cancer Epidemiol.*, **34**, 461–471.
128. Sun, J. *et al.* (2013) Targeting the metastasis suppressor, NDRG1, using novel iron chelators: regulation of stress fiber-mediated tumor cell migration via modulation of the ROCK1/pMLC2 signaling pathway. *Mol. Pharmacol.*, **83**, 454–469.

Received March 27, 2013; revised April 26, 2013; accepted May 1, 2013
